# Supplementary material
Source: PubMed Central journal article supplement (PMC10067274)

## Supplemental Figure 1

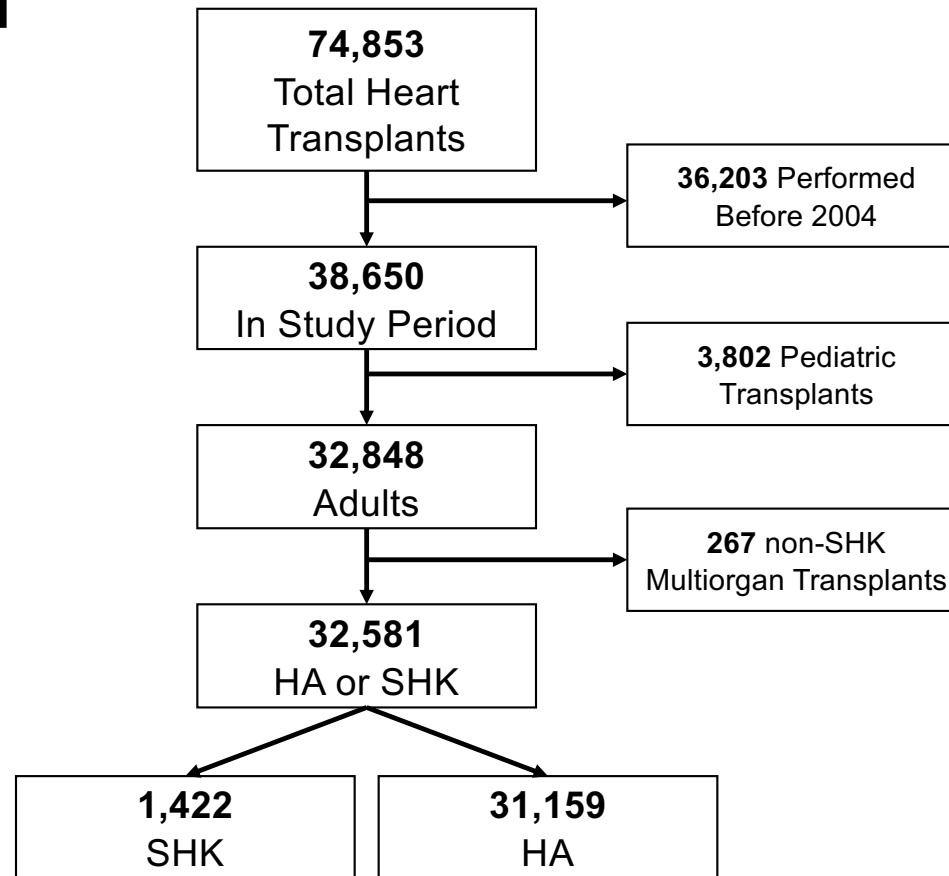

**Supplemental Figure 1 Legend:** Flow diagram for study population.

Supplement: NIHMS1872281-supplement-Supplemental_Figure_1.pdf [file NIHMS1872281-supplement-Supplemental_Figure_1.pdf]
